# Supplementary material
Source: PubMed Central journal article supplement (PMC6812493)
Supplement: NIHMS1038202-supplement-SupFig_1_2.pdf [file NIHMS1038202-supplement-SupFig_1_2.pdf]

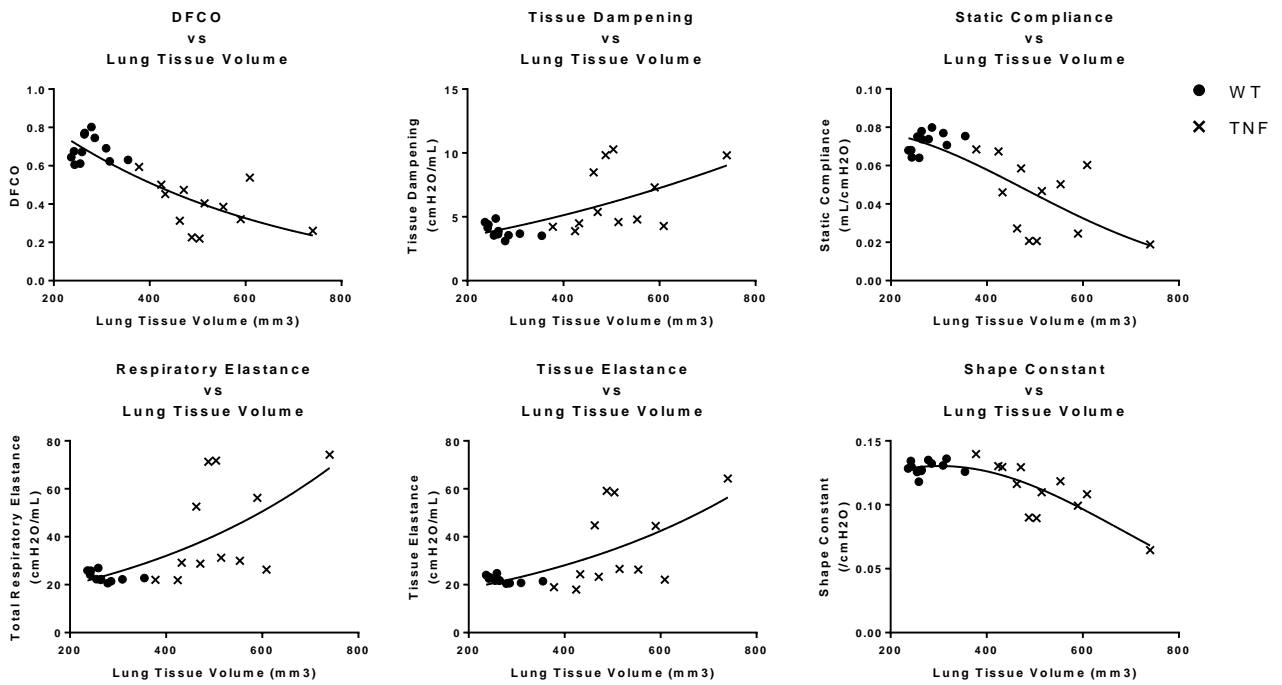

**Supplemental Figure 1. Tissue volume is significantly correlated to multiple parameters of pulmonary physiology.** Non-linear regressions were performed comparing the tissue volumes derived from micro-CT imaging against various parameters of pulmonary function and mechanics. Spearman's correlation analyses were applied to these regressions. Resulting statistics are listed in Supplementary Table 1. ● = WT, x = TNF-Tg, n=12 per genotype.
