# Supplementary material
Source: PubMed Central journal article supplement (PMC6812493)
Supplement: NIHMS1038202-supplement-SupTab_1_2.pdf [file NIHMS1038202-supplement-SupTab_1_2.pdf]

|                                 | Tissue Volume vs DFCO | Tissue Volume vs G | Tissue Volume vs $C_{st}$ | Tissue Volume vs $E_{rs}$ | Tissue Volume vs H | Tissue Volume vs k |
|---------------------------------|-----------------------|--------------------|---------------------------|---------------------------|--------------------|--------------------|
| R <sup>2</sup> (Non-Linear Fit) | 0.7009                | 0.4093             | 0.606                     | 0.4639                    | 0.4292             | 0.7025             |
| Spearman's Correlation (Rho)    | -0.7739               | 0.5623             | -0.687                    | 0.6265                    | 0.4862             | -0.5826            |
| Spearman's p value              | <0.0001               | 0.0052             | 0.0002                    | 0.0014                    | 0.0187             | 0.0028             |
| Significance                    | ****                  | **                 | ***                       | **                        | *                  | **                 |

**Supplemental Table 1. Regression analysis between pulmonary physiology outcome measures and lung tissue volume finds significant correlations with multiple outcome measures.** PFT and micro-CT data for all 24 mice in this study were combined for non-linear regression and correlation analyses (n=24). Correlations were calculated for the diffusion factor of carbon monoxide (DFCO), tissue dampening (G), static compliance ( $C_{st}$ ), total respiratory elastance ( $E_{rs}$ ), tissue elastance (H), and the shape constant of the pressure-volume curve (k). Spearman's correlations for each set of parameters are listed for all data points (\*p<0.05, \*\*p<0.01, \*\*\*p<0.001, \*\*\*\*p<0.0001).
